# Supplementary material
Source: PubMed Central journal article supplement (PMC3110887)
Supplement: tableS1.pdf [file tableS1.pdf]

**Table S1.** Sequence of oligonucleotides

| Name       | Sequence                 |
|------------|--------------------------|
| 18S rRNA-F | TTGACGGAAGGGCACCACCAG    |
| 18S rRNA-R | CTCCTTAATGTCACGCACGATTTC |
| MHC-F      | CGCCACCTGGAGCGGATGA      |
| MHC-R      | CTTGCGGTCCTCCTCGGTCTGGT  |
| myogenin-F | AGCGGCTGCCTAAAGTGGAGAT   |
| myogenin-R | AGGAGGCGCTGTGGGAGTTG     |
| MyoD-F     | CGGGGACCGGGATGATGGAC     |
| MyoD-R     | TAGTAGGCGGTGTCGTAGCC     |
| Myf5-F     | ACAGCAGCTTTGACAGCATC     |
| Myf5-R     | AAGCAATCCAAGCTGGACAC     |
| Pax7-F     | GCTACCAGTACAGCCAGTATG    |
| Pax7-R     | GTCACTAAGCATGGGTAGATG    |
